# Supplementary material for: Enhanced lignin depolymerisation to produce butylated hydroxytoluene and 4-propylguaiacol on carbon-nitride supported molybdenum catalysts
Source: Royal Society of Chemistry journal article supplement (doi:10.1039/d3re00115f), 2023-01-01
Supplement: d3re00115f1.pdf [file d3re00115f1.pdf]

## Supplementary Data

### **Enhanced lignin depolymerization to produce butylated hydroxytoluene and 4-propylguaiacol on carbon-nitride-supported molybdenum catalysts**

Zhen Wu,<sup>\*a</sup> Hongli Bai,<sup>a</sup> Yifan Ji,<sup>a</sup> Tao Wang,<sup>a</sup> Zihe Zhao,<sup>a</sup> Yetao Jiang,<sup>a</sup> Xiaoyu Wang,<sup>a</sup> Jiaxing Xu,<sup>a</sup> Aiyong He,<sup>a</sup> Sheng Chen<sup>b</sup> and Lei Hu<sup>\*a</sup>

*<sup>a</sup>Jiangsu Key Laboratory for Biomass-based Energy and Enzyme Technology, Jiangsu Collaborative Innovation Center of Regional Modern Agriculture & Environmental Protection, School of Chemistry and Chemical Engineering, Huaiyin Normal University, Huai'an 223300, China.*

*<sup>b</sup>Beijing Key Laboratory of Lignocellulosic Chemistry, College of Materials Science and Technology, Beijing Forestry University, Beijing 100083, China.*

\*To whom correspondence should be addressed. E-mail: wuzhen@hytc.edu.cn;  
hulei@hytc.edu.cn.

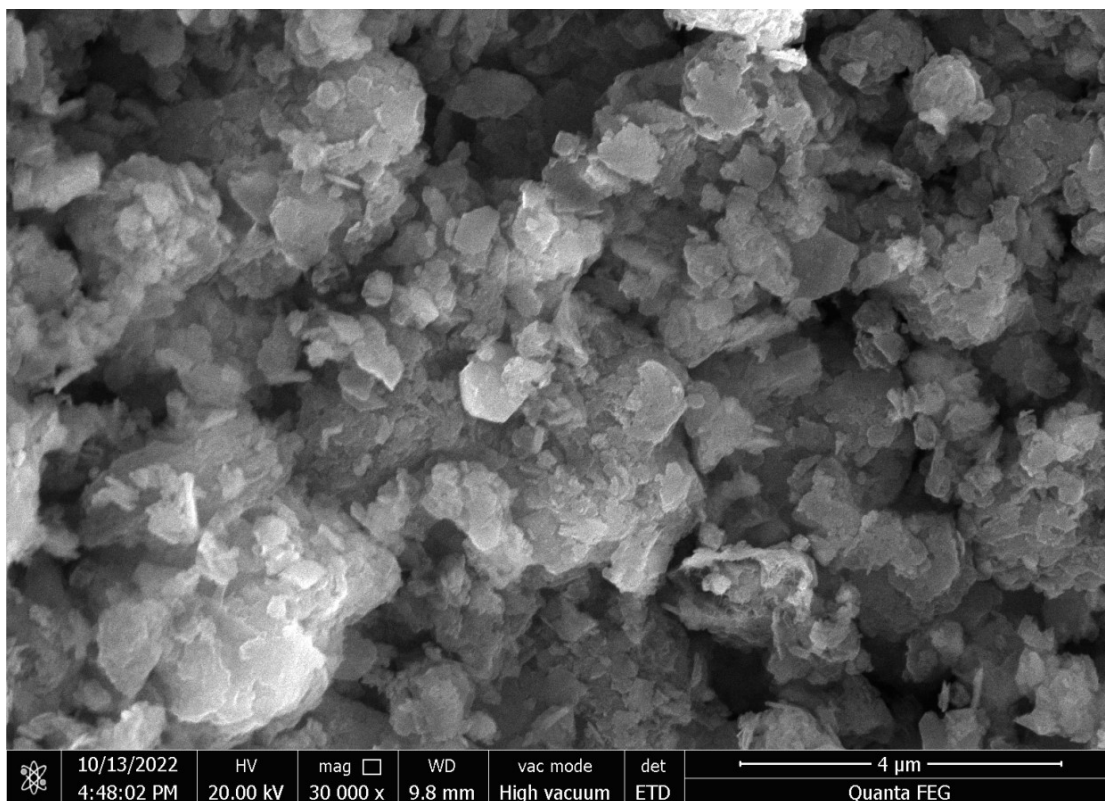

**Figure S1.** SEM image of Mo/CN.

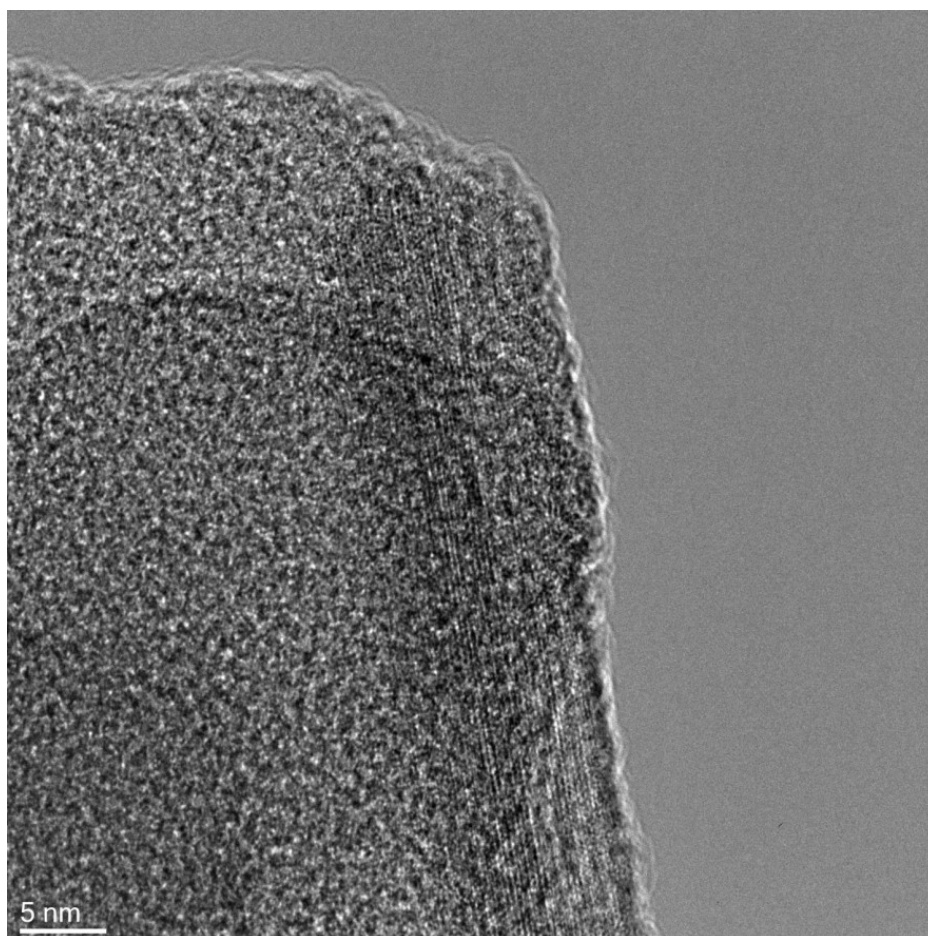

**Figure S2.** TEM image of Mo/CN.

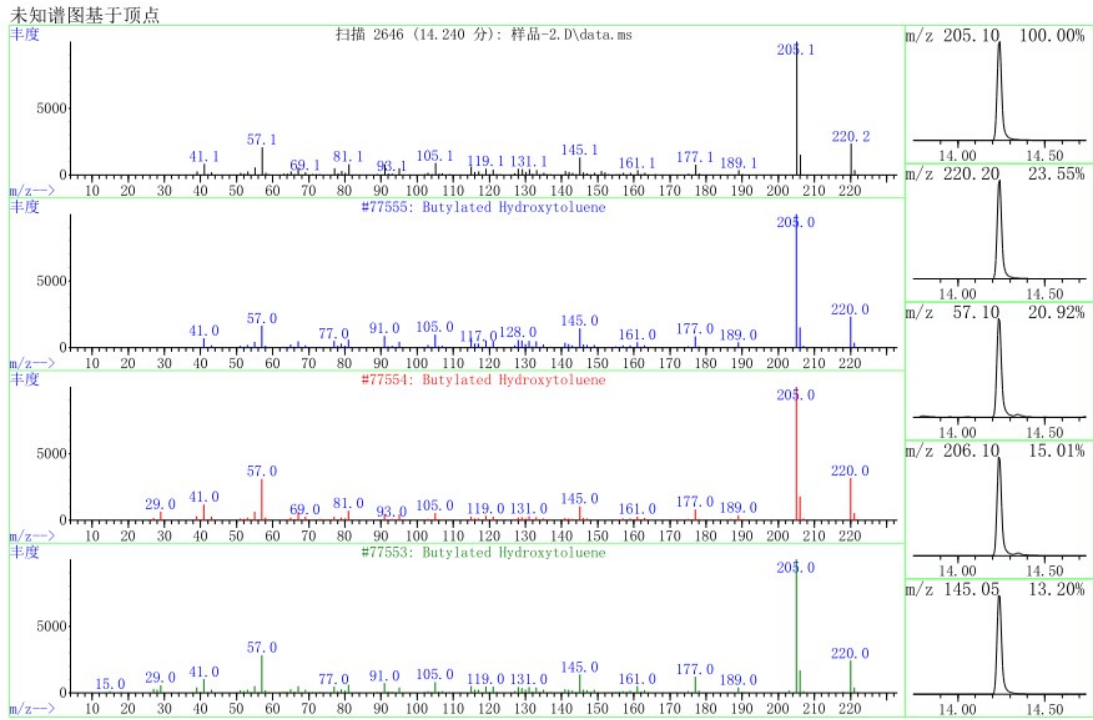

Data File: C:\msdchem\2\data\2022\20221013-2210109460木质素降解产物\BSB\样品-2.D

样品: sample-10

峰编号: 19      14.240 分钟处      面积: 69738244      面积 % 2.34

每个谱库中 3 个最匹配的记录。      Ref\#      CAS\#      匹配度

| Ref\# | CAS\#             | 匹配度 |
|-------|-------------------|-----|
| 1     | 77555 000128-37-0 | 98  |
| 2     | 77554 000128-37-0 | 96  |
| 3     | 77553 000128-37-0 | 96  |

**Figure S3.** Mass spectrometric analysis of BHT peaked at 14.24'.

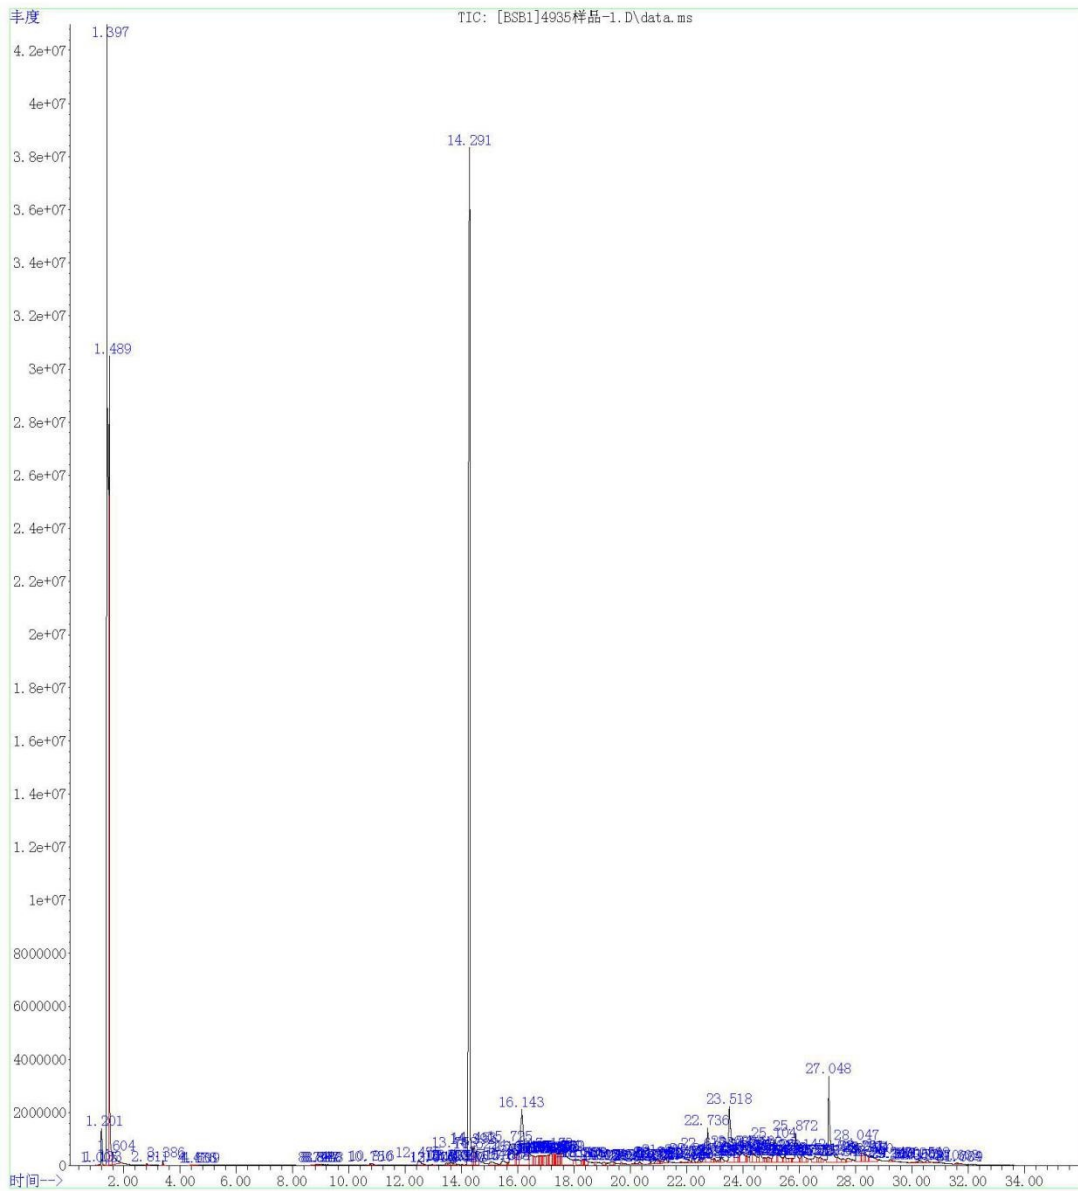

20220929-生... 远叠不分流. M Thu Sep 29 16:44:38 2022

页面: 1

**Figure S4.** GC-MS TIC of TSPs obtained from kraft lignin depolymerization on CN.

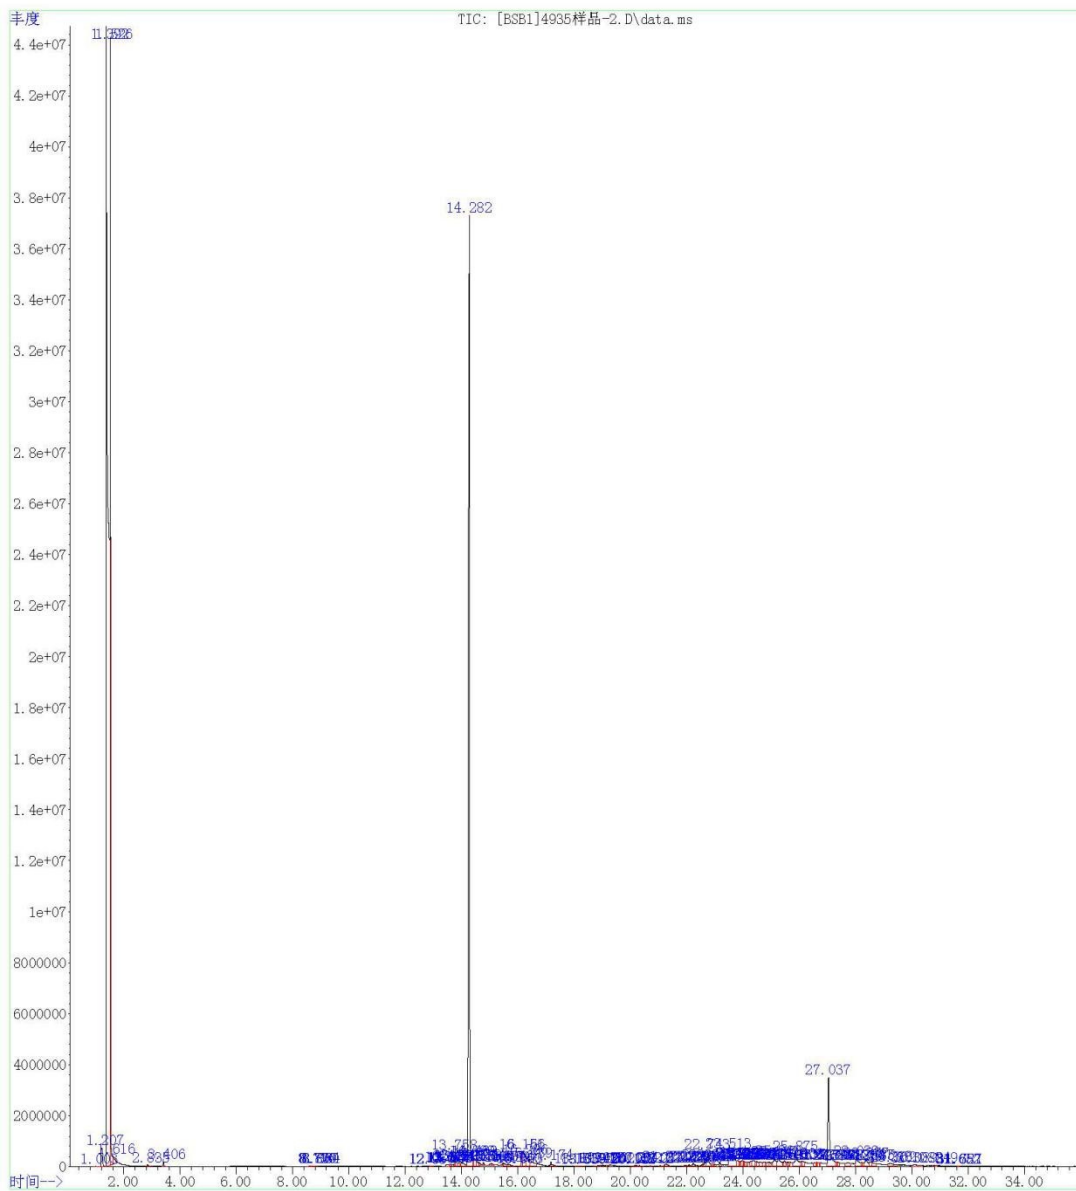

20220929-生...远叠不分流. M Thu Sep 29 16:47:02 2022

页面: 1

**Figure S5.** GC-MS TIC of TSPs obtained from kraft lignin depolymerization on Mo/CN.

**Table S1.** Physicochemical properties of the lignin samples

| Sample | Lignin content <sup>a</sup><br>(wt%) | Element content (wt%) |      |       |      |      | $M_w$<br>(g/mol) |
|--------|--------------------------------------|-----------------------|------|-------|------|------|------------------|
|        |                                      | C                     | H    | O     | N    | S    |                  |
| CAHL   | 80.27                                | 58.24                 | 5.03 | 33.87 | 0.79 | 2.07 | 8927             |
| CEL    | 64.33                                | 55.27                 | 5.96 | 36.68 | 0.81 | 1.28 | 2623             |
| KL     | 82.91                                | 61.39                 | 5.22 | 30.48 | 0.67 | 2.24 | 3133             |

<sup>a</sup> Klason lignin (acid-insoluble lignin)

**Table S2.** Products identification by GC-MS via catalytic depolymerization of lignin on Mo/CN

| No. | Retention time/min | Structure                                             | Quantify/% | Qualitative/% |
|-----|--------------------|-------------------------------------------------------|------------|---------------|
| 1   | 1.62               | Tetrahydrofuran                                       | 41.02      | 90            |
| 2   | 13.52              | Vanillin                                              | 0.21       | 94            |
| 3   | 13.76              | Phenol, 3-(1,1-dimethylethyl)-4-methoxy-              | 0.24       | 75            |
| 4   | 14.28              | Butylated Hydroxytoluene (BHT)                        | 26.73      | 98            |
| 5   | 14.4               | Apocynin                                              | 0.47       | 90            |
| 6   | 14.47              | Ethanone, 1-(3-hydroxy-4-methoxyphenyl)-              | 0.24       | 70            |
| 7   | 15.04              | Homovanillyl alcohol                                  | 0.11       | 76            |
| 8   | 16.15              | Homovanillic acid                                     | 2.02       | 68            |
| 9   | 19.28              | Benzoic acid, 3,5-dihydroxy-                          | 0.35       | 65            |
| 10  | 20.12              | 2-Propanone, 1-hydroxy-3-(4-hydroxy-3-methoxyphenyl)- | 0.17       | 76            |



|    |       |                                      |      |    |
|----|-------|--------------------------------------|------|----|
| 11 | 27.04 | 4-propylguaiacol                     | 3.77 | 84 |
| 12 | 28.21 | Phenol, 2-methoxy-4-(methoxymethyl)- | 0.17 | 57 |

---
